# Supplementary material for: In Vitro Bioaccessibility and Health Risk Assessment of Arsenic and Zinc Contaminated Soil Stabilized by Ferrous Sulfate: Effect of Different Dietary Components
Source: MDPI journal article supplement (doi:10.3390/toxics11010023), 2022-12-26
Supplement: s1 [file s1]

# Supplementary Materials: In Vitro Bioaccessibility and Health Risk Assessment of Arsenic and Zinc Contaminated Soil Stabilized by Ferrous Sulfate: Effect of Different Dietary Components

Yi Fang, Yuxue Cui, Xiaoli Mou, Li Lu, Jiali Shentu and Min Zhu

## Human health risk assessment

Average daily intake (ADD) of soil heavy metal accidentally ingested was calculated as follows:

$$ADD = \frac{C_{total} \times I_R \times E_F \times E_D \times 10^{-6}}{BW \times AT} \quad (1)$$

where  $C_{total}$  (mg kg<sup>-1</sup>) was the total concentration of soil heavy metals, and the remaining parameters ( $I_R$ ,  $E_F$ ,  $E_D$ ,  $BW$  and  $AT$ ) were shown in Table S1.

The HQ and CR based on total heavy metals concentration and heavy metal bioaccessibility were estimated as follows:

$$HQ_{total} = \frac{ADD}{RfD} \quad (2)$$

$$HQ_{bioaccessible} = \frac{ADD \times BAC}{RfD} \quad (3)$$

$$CR_{total} = ADD \times CSF \quad (4)$$

$$CR_{bioaccessible} = ADD \times BAC \times CSF \quad (5)$$

where  $BAC$  refers to the heavy metal bioaccessibility. The specific values of oral reference dose ( $RfD$ ) and cancer slope factors ( $CSF$ ) were shown in Table S2.

**Table S1.** Calculation parameters and values used in health risk assessment model to evaluate exposure risks of soil.

| Parameter | Description                                    | Unit                   | Children                                                                 | Adult | Reference |
|-----------|------------------------------------------------|------------------------|--------------------------------------------------------------------------|-------|-----------|
| $I_R$     | Ingestion rate of soil                         | mg day <sup>-1</sup>   | 200                                                                      | 100   | [1,2]     |
| $E_F$     | Exposure frequency                             | day year <sup>-1</sup> | 350                                                                      | 350   |           |
| $E_D$     | Exposure duration                              | years                  | 6                                                                        | 24    |           |
| $BW$      | Average body weight                            | kg                     | 15                                                                       | 70    |           |
| $AT$      | Average time of exposure to contaminated soils | day                    | $365 \times E_D$<br>(non-carcinogenic)<br>$365 \times 70$ (carcinogenic) |       |           |

**Table S2.** Corresponding reference dose ( $RfD$ ) and slope factors ( $CSF$ ) values of metals in soil.

| Elements | $RfD$ (mg (kg d) <sup>-1</sup> ) [2,3] | $SF$ ((kg d) mg <sup>-1</sup> ) [1] |
|----------|----------------------------------------|-------------------------------------|
| Pb       | 3.50E-03                               | 8.50E-03                            |
| Ni       | 2.00E-02                               | n/a                                 |
| Cu       | 4.00E-02                               | n/a                                 |
| Zn       | 3.00E-01                               | n/a                                 |
| Cd       | 1.00E-03                               | 6.1E+00                             |
| Cr       | 3.00E-03                               | 8.50E-03                            |

Note: n/a not available.

**Table S3.** Bioavailability concentration of metals in experimental soil before and after FeSO<sub>4</sub> stabilization.

| Bioavailability           | Before FeSO <sub>4</sub> stabilization | After FeSO <sub>4</sub> stabilization | <i>p</i> value |
|---------------------------|----------------------------------------|---------------------------------------|----------------|
| As (mg kg <sup>-1</sup> ) | 13.51                                  | 11.15                                 | **             |
| Zn (mg kg <sup>-1</sup> ) | 15.70                                  | 16.89                                 | **             |
| <i>p</i> value            | **                                     | **                                    |                |

Note: \*\* means  $p < 0.01$ .

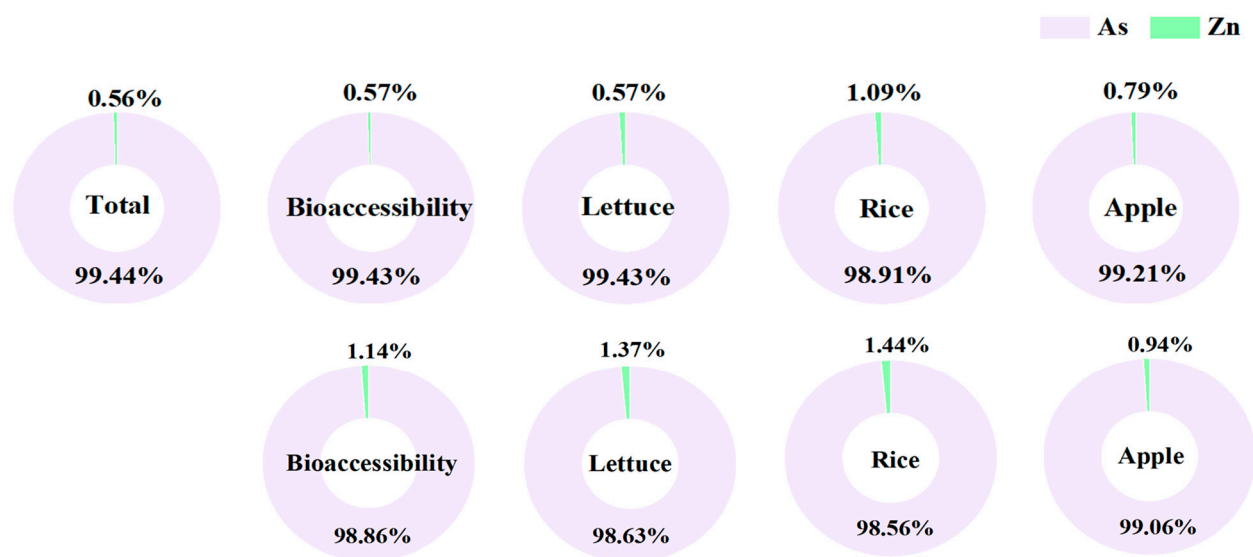**Figure S1.** As and Zn accounted for HQ values in adults and children in the co-digestion system of food and contaminated soil.

## References

1. Huang, J.; Wu, Y.; Sun, J.; Li, X.; Geng, X.; Zhao, M.; Sun, T.; Fan, Z. Health risk assessment of heavy metal(loid)s in park soils of the largest megacity in China by using Monte Carlo simulation coupled with Positive matrix factorization model. *J. Hazard. Mater.* **2021**, *415*, 125629.
2. Sun, J.; Zhao, M.; Huang, J.; Liu, Y.; Wu, Y.; Cai, B.; Han, Z.; Huang, H.; Fan, Z. Determination of priority control factors for the management of soil trace metal(loid)s based on source-oriented health risk assessment. *J. Hazard. Mater.* **2022**, *423*, 127116.
3. Men, C.; Liu, R.; Wang, Q.; Miao, Y.; Wang, Y.; Jiao, L.; Li, L.; Cao, L.; Shen, Z.; Li, Y.; et al. Spatial-temporal characteristics, source-specific variation and uncertainty analysis of health risks associated with heavy metals in road dust in Beijing, China. *Environ. Pollut.* **2021**, *278*, 116866.
