# Supplementary material for: In Vitro Bioaccessibility and Health Risk Assessment of Arsenic and Zinc Contaminated Soil Stabilized by Ferrous Sulfate: Effect of Different Dietary Components
Source: Toxics. 2022 Dec 26;11(1):23. doi: 10.3390/toxics11010023 (PMC9863096; doi:10.3390/toxics11010023)
Supplement: Supplementary file 1 [file toxics-11-00023-s001.zip › Supplemental Table S4.xlsx]

## Sheet: Sheet1
	Supplemental Table S4 - Figure 1 and 2 Statistical Analyses
Figure 1							Figure 2
		Chemical	Comparison	Summary	P Value				Chemical	Comparison	Summary	P Value
Before FeSO4 stabilization	Gastric phase	Lettuce	0% vs. 25%	ns	0.146		Before FeSO4 stabilization	Gastric phase	Lettuce	0% vs. 25%	**	p<0.01
			0% vs. 50%	**	p<0.01					0% vs. 50%	**	p<0.01
			0% vs. 100%	**	p<0.01					0% vs. 100%	**	p<0.01
			0% vs. 200%	**	p<0.01					0% vs. 200%	**	p<0.01
			0% vs. 400%	**	p<0.01					0% vs. 400%	**	p<0.01
			25% vs. 50%	**	p<0.01					25% vs. 50%	**	p<0.01
			25% vs. 100%	**	p<0.01					25% vs. 100%	**	p<0.01
			25% vs. 200%	**	p<0.01					25% vs. 200%	**	p<0.01
			25% vs. 400%	**	p<0.01					25% vs. 400%	**	p<0.01
			50% vs. 100%	**	p<0.01					50% vs. 100%	**	p<0.01
			50% vs. 200%	**	p<0.01					50% vs. 200%	**	p<0.01
			50% vs. 400%	**	p<0.01					50% vs. 400%	**	p<0.01
			100% vs. 200%	ns	0.08					100% vs. 200%	ns	0.5123
			100% vs. 400%	**	p<0.01					100% vs. 400%	**	p<0.01
			200% vs. 400%	**	p<0.01					200% vs. 400%	**	p<0.01
		Rice	0% vs. 25%	**	p<0.01				Rice	0% vs. 25%	**	p<0.01
			0% vs. 50%	**	p<0.01					0% vs. 50%	**	p<0.01
			0% vs. 100%	**	p<0.01					0% vs. 100%	**	p<0.01
			0% vs. 200%	**	p<0.01					0% vs. 200%	**	p<0.01
			0% vs. 400%	ns	0.142					0% vs. 400%	**	p<0.01
			25% vs. 50%	**	p<0.01					25% vs. 50%	**	p<0.01
			25% vs. 100%	**	p<0.01					25% vs. 100%	**	p<0.01
			25% vs. 200%	**	p<0.01					25% vs. 200%	ns	0.968
			25% vs. 400%	**	p<0.01					25% vs. 400%	ns	0.0887
			50% vs. 100%	ns	0.348					50% vs. 100%	**	p<0.01
			50% vs. 200%	*	p<0.05					50% vs. 200%	**	p<0.01
			50% vs. 400%	**	p<0.01					50% vs. 400%	**	p<0.01
			100% vs. 200%		0.156					100% vs. 200%	**	p<0.01
			100% vs. 400%	**	p<0.01					100% vs. 400%	**	p<0.01
			200% vs. 400%	**	p<0.01					200% vs. 400%	ns	0.082
		Apple	0% vs. 25%	**	p<0.01				Apple	0% vs. 25%	**	p<0.01
			0% vs. 50%	**	p<0.01					0% vs. 50%	**	p<0.01
			0% vs. 100%	**	p<0.01					0% vs. 100%	**	p<0.01
			0% vs. 200%	**	p<0.01					0% vs. 200%	**	p<0.01
			0% vs. 400%	**	p<0.01					0% vs. 400%	**	p<0.01
			25% vs. 50%	ns	0.541					25% vs. 50%	ns	0.5852
			25% vs. 100%	**	p<0.01					25% vs. 100%	*	0.0189
			25% vs. 200%	**	p<0.01					25% vs. 200%	**	p<0.01
			25% vs. 400%	**	p<0.01					25% vs. 400%	**	p<0.01
			50% vs. 100%	*	p<0.05					50% vs. 100%	ns	0.0634
			50% vs. 200%	**	p<0.01					50% vs. 200%	**	p<0.01
			50% vs. 400%	**	p<0.01					50% vs. 400%	**	p<0.01
			100% vs. 200%	**	p<0.01					100% vs. 200%	ns	0.0819
			100% vs. 400%	**	p<0.01					100% vs. 400%	**	p<0.01
			200% vs. 400%	**	p<0.01					200% vs. 400%	**	p<0.01
	Intestinal phase	Lettuce	0% vs. 25%	**	p<0.01			Intestinal phase	Lettuce	0% vs. 25%	ns	0.404
			0% vs. 50%	**	p<0.01					0% vs. 50%	**	p<0.01
			0% vs. 100%	**	p<0.01					0% vs. 100%	**	p<0.01
			0% vs. 200%	**	p<0.01					0% vs. 200%	**	p<0.01
			0% vs. 400%	**	p<0.01					0% vs. 400%	**	p<0.01
			25% vs. 50%	**	p<0.01					25% vs. 50%	**	p<0.01
			25% vs. 100%	ns	0.499					25% vs. 100%	**	p<0.01
			25% vs. 200%	**	p<0.01					25% vs. 200%	**	p<0.01
			25% vs. 400%	**	p<0.01					25% vs. 400%	**	p<0.01
			50% vs. 100%	**	p<0.01					50% vs. 100%	**	p<0.01
			50% vs. 200%	ns	0.8					50% vs. 200%	**	p<0.01
			50% vs. 400%	**	p<0.01					50% vs. 400%	**	p<0.01
			100% vs. 200%	**	p<0.01					100% vs. 200%	**	p<0.01
			100% vs. 400%	**	p<0.01					100% vs. 400%	**	p<0.01
			200% vs. 400%	**	p<0.01					200% vs. 400%	**	p<0.01
		Rice	0% vs. 25%	ns	0.177				Rice	0% vs. 25%	ns	0.117
			0% vs. 50%	ns	0.241					0% vs. 50%	ns	0.655
			0% vs. 100%	ns	0.688					0% vs. 100%	ns	0.731
			0% vs. 200%	**	p<0.01					0% vs. 200%	ns	0.39
			0% vs. 400%	**	p<0.01					0% vs. 400%	**	p<0.01
			25% vs. 50%	ns	0.852					25% vs. 50%	ns	0.254
			25% vs. 100%	ns	0.336					25% vs. 100%	ns	0.215
			25% vs. 200%	ns	0.116					25% vs. 200%	ns	0.464
			25% vs. 400%	ns	0.149					25% vs. 400%	**	p<0.01
			50% vs. 100%	ns	0.436					50% vs. 100%	ns	0.917
			50% vs. 200%	ns	0.081					50% vs. 200%	ns	0.677
			50% vs. 400%	ns	0.105					50% vs. 400%	**	p<0.01
			100% vs. 200%	*	p<0.05					100% vs. 200%	ns	0.603
			100% vs. 400%	*	p<0.05					100% vs. 400%	**	p<0.01
			200% vs. 400%	ns	0.893					200% vs. 400%	**	p<0.01
		Apple	0% vs. 25%	**	p<0.01				Apple	0% vs. 25%	**	p<0.01
			0% vs. 50%	ns	0.432					0% vs. 50%	**	p<0.01
			0% vs. 100%	**	p<0.01					0% vs. 100%	**	p<0.01
			0% vs. 200%	**	p<0.01					0% vs. 200%	**	p<0.01
			0% vs. 400%	**	p<0.01					0% vs. 400%	**	p<0.01
			25% vs. 50%	**	p<0.01					25% vs. 50%	ns	0.242
			25% vs. 100%	**	p<0.01					25% vs. 100%	ns	0.362
			25% vs. 200%	**	p<0.01					25% vs. 200%	*	p<0.05
			25% vs. 400%	**	p<0.01					25% vs. 400%	**	p<0.01
			50% vs. 100%	**	p<0.01					50% vs. 100%	ns	0.791
			50% vs. 200%	**	p<0.01					50% vs. 200%	ns	0.23
			50% vs. 400%	**	p<0.01					50% vs. 400%	**	p<0.01
			100% vs. 200%	**	p<0.01					100% vs. 200%	ns	0.146
			100% vs. 400%	**	p<0.01					100% vs. 400%	**	p<0.01
			200% vs. 400%	**	p<0.01					200% vs. 400%	**	p<0.01
After FeSO4 stabilization	Gastric phase	Lettuce	0% vs. 25%	**	p<0.01		After FeSO4 stabilization	Gastric phase	Lettuce	0% vs. 25%	**	p<0.01
			0% vs. 50%	**	p<0.01					0% vs. 50%	ns	0.473
			0% vs. 100%	**	p<0.01					0% vs. 100%	*	p<0.05
			0% vs. 200%	**	p<0.01					0% vs. 200%	**	p<0.01
			0% vs. 400%	**	p<0.01					0% vs. 400%	**	p<0.01
			25% vs. 50%	ns	0.912					25% vs. 50%	**	p<0.01
			25% vs. 100%	**	p<0.01					25% vs. 100%	*	p<0.05
			25% vs. 200%	**	p<0.01					25% vs. 200%	**	p<0.01
			25% vs. 400%	**	p<0.01					25% vs. 400%	**	p<0.01
			50% vs. 100%	**	p<0.01					50% vs. 100%	ns	0.153
			50% vs. 200%	**	p<0.01					50% vs. 200%	**	p<0.01
			50% vs. 400%	**	p<0.01					50% vs. 400%	**	p<0.01
			100% vs. 200%	ns	0.953					100% vs. 200%	**	p<0.01
			100% vs. 400%	ns	0.166					100% vs. 400%	**	p<0.01
			200% vs. 400%	ns	0.149					200% vs. 400%	**	p<0.01
		Rice	0% vs. 25%	ns	0.169				Rice	0% vs. 25%	ns	0.186
			0% vs. 50%	ns	0.512					0% vs. 50%	ns	0.872
			0% vs. 100%	ns	0.165					0% vs. 100%	*	p<0.05
			0% vs. 200%	ns	0.324					0% vs. 200%	*	p<0.05
			0% vs. 400%	ns	0.63					0% vs. 400%	**	p<0.01
			25% vs. 50%	ns	0.647					25% vs. 50%	ns	0.14
			25% vs. 100%	*	p<0.05					25% vs. 100%	**	p<0.01
			25% vs. 200%	*	p<0.05					25% vs. 200%	**	p<0.01
			25% vs. 400%	ns	0.117					25% vs. 400%	**	p<0.01
			50% vs. 100%	*	p<0.05					50% vs. 100%	*	p<0.05
			50% vs. 200%	ns	0.106					50% vs. 200%	ns	0.054
			50% vs. 400%	ns	0.258					50% vs. 400%	**	p<0.01
			100% vs. 200%	ns	0.679					100% vs. 200%	ns	0.852
			100% vs. 400%	ns	0.358					100% vs. 400%	**	p<0.01
			200% vs. 400%	ns	0.611					200% vs. 400%	**	p<0.01
		Apple	0% vs. 25%	ns	0.983				Apple	0% vs. 25%	*	p<0.05
			0% vs. 50%	ns	0.332					0% vs. 50%	ns	0.192
			0% vs. 100%	ns	0.062					0% vs. 100%	ns	0.976
			0% vs. 200%	**	p<0.01					0% vs. 200%	ns	0.96
			0% vs. 400%	**	p<0.01					0% vs. 400%	*	p<0.05
			25% vs. 50%	ns	0.321					25% vs. 50%	ns	0.181
			25% vs. 100%	ns	0.06					25% vs. 100%	*	p<0.05
			25% vs. 200%	**	p<0.01					25% vs. 200%	*	p<0.05
			25% vs. 400%	**	p<0.01					25% vs. 400%	**	p<0.01
			50% vs. 100%	ns	0.352					50% vs. 100%	ns	0.203
			50% vs. 200%	**	p<0.01					50% vs. 200%	ns	0.21
			50% vs. 400%	**	p<0.01					50% vs. 400%	**	p<0.01
			100% vs. 200%	*	p<0.05					100% vs. 200%	ns	0.984
			100% vs. 400%	**	p<0.01					100% vs. 400%	**	p<0.01
			200% vs. 400%	**	p<0.01					200% vs. 400%	**	p<0.01
	Intestinal phase	Lettuce	0% vs. 25%	**	p<0.01			Intestinal phase	Lettuce	0% vs. 25%	**	p<0.01
			0% vs. 50%	**	p<0.01					0% vs. 50%	**	p<0.01
			0% vs. 100%	**	p<0.01					0% vs. 100%	**	p<0.01
			0% vs. 200%	**	p<0.01					0% vs. 200%	**	p<0.01
			0% vs. 400%	**	p<0.01					0% vs. 400%	**	p<0.01
			25% vs. 50%	**	p<0.01					25% vs. 50%	**	p<0.01
			25% vs. 100%	**	p<0.01					25% vs. 100%	**	p<0.01
			25% vs. 200%	**	p<0.01					25% vs. 200%	**	p<0.01
			25% vs. 400%	**	p<0.01					25% vs. 400%	**	p<0.01
			50% vs. 100%	ns	0.242					50% vs. 100%	**	p<0.01
			50% vs. 200%	**	p<0.01					50% vs. 200%	**	p<0.01
			50% vs. 400%	**	p<0.01					50% vs. 400%	**	p<0.01
			100% vs. 200%	ns	0.061					100% vs. 200%	**	p<0.01
			100% vs. 400%	**	p<0.01					100% vs. 400%	**	p<0.01
			200% vs. 400%	**	p<0.01					200% vs. 400%	**	p<0.01
		Rice	0% vs. 25%	ns	0.605				Rice	0% vs. 25%	**	p<0.01
			0% vs. 50%	*	p<0.05					0% vs. 50%	**	p<0.01
			0% vs. 100%	ns	0.337					0% vs. 100%	**	p<0.01
			0% vs. 200%	ns	0.488					0% vs. 200%	**	p<0.01
			0% vs. 400%	ns	0.179					0% vs. 400%	**	p<0.01
			25% vs. 50%	**	p<0.01					25% vs. 50%	ns	1
			25% vs. 100%	ns	0.144					25% vs. 100%	ns	0.48
			25% vs. 200%	ns	0.23					25% vs. 200%	**	p<0.01
			25% vs. 400%	ns	0.402					25% vs. 400%	*	p<0.05
			50% vs. 100%	ns	0.111					50% vs. 100%	ns	0.48
			50% vs. 200%	ns	0.065					50% vs. 200%	**	p<0.01
			50% vs. 400%	**	p<0.01					50% vs. 400%	*	p<0.05
			100% vs. 200%	ns	0.787					100% vs. 200%	**	p<0.01
			100% vs. 400%	*	p<0.05					100% vs. 400%	ns	0.064
			200% vs. 400%	*	p<0.05					200% vs. 400%	*	p<0.05
		Apple	0% vs. 25%	ns	0.793				Apple	0% vs. 25%	ns	0.058
			0% vs. 50%	ns	0.688					0% vs. 50%	**	p<0.01
			0% vs. 100%	ns	0.377					0% vs. 100%	**	p<0.01
			0% vs. 200%	**	p<0.01					0% vs. 200%	**	p<0.01
			0% vs. 400%	**	p<0.01					0% vs. 400%	**	p<0.01
			25% vs. 50%	ns	0.507					25% vs. 50%	**	p<0.01
			25% vs. 100%	ns	0.254					25% vs. 100%	**	p<0.01
			25% vs. 200%	**	p<0.01					25% vs. 200%	**	p<0.01
			25% vs. 400%	**	p<0.01					25% vs. 400%	**	p<0.01
			50% vs. 100%	ns	0.627					50% vs. 100%	**	p<0.01
			50% vs. 200%	**	p<0.01					50% vs. 200%	**	p<0.01
			50% vs. 400%	**	p<0.01					50% vs. 400%	**	p<0.01
			100% vs. 200%	**	p<0.01					100% vs. 200%	*	p<0.05
			100% vs. 400%	**	p<0.01					100% vs. 400%	**	p<0.01
			200% vs. 400%	**	p<0.01					200% vs. 400%	**	p<0.01
ns = not significant (p > 0.05)
* = p < 0.05
** = p < 0.01
