# Supplementary material for: In Vitro Bioaccessibility and Health Risk Assessment of Arsenic and Zinc Contaminated Soil Stabilized by Ferrous Sulfate: Effect of Different Dietary Components
Source: Toxics. 2022 Dec 26;11(1):23. doi: 10.3390/toxics11010023 (PMC9863096; doi:10.3390/toxics11010023)
Supplement: Supplementary file 1 [file toxics-11-00023-s001.zip › Supplemental Table S5.xlsx]

## Sheet: Sheet1
	Supplemental Table S5 - Figure 3 and 5 Statistical Analyses
Figure 3								Figure 5
		Fraction	Comparison	Summary	P Value				Fraction	Comparison	Summary	P Value
Before FeSO4 stabilization	Gastric phase	AF1	Soil vs. Lettce	**	p<0.01		Before FeSO4 stabilization	Gastric phase	ZF1	Soil vs. Lettce	**	p<0.01
			Soil vs. Cooked rice	**	p<0.01					Soil vs. Cooked rice	**	p<0.01
			Soil vs. Apple	**	p<0.01					Soil vs. Apple	**	p<0.01
			Lettce vs. Cooked rice	**	p<0.01					Lettce vs. Cooked rice	**	p<0.01
			Lettce vs. Apple	**	p<0.01					Lettce vs. Apple	ns	0.071
			Cooked rice vs. Apple	**	p<0.01					Cooked rice vs. Apple	**	p<0.01
		AF2	Soil vs. Lettce	**	p<0.01				ZF2	Soil vs. Lettce	**	p<0.01
			Soil vs. Cooked rice	**	p<0.01					Soil vs. Cooked rice	**	p<0.01
			Soil vs. Apple	**	p<0.01					Soil vs. Apple	**	p<0.01
			Lettce vs. Cooked rice	**	p<0.01					Lettce vs. Cooked rice	**	p<0.01
			Lettce vs. Apple	**	p<0.01					Lettce vs. Apple	**	p<0.01
			Cooked rice vs. Apple	**	p<0.01					Cooked rice vs. Apple	**	p<0.01
		AF3	Soil vs. Lettce	**	p<0.01				ZF3	Soil vs. Lettce	ns	0.841
			Soil vs. Cooked rice	**	p<0.01					Soil vs. Cooked rice	**	p<0.01
			Soil vs. Apple	**	p<0.01					Soil vs. Apple	**	p<0.01
			Lettce vs. Cooked rice	ns	0.949					Lettce vs. Cooked rice	**	p<0.01
			Lettce vs. Apple	**	p<0.01					Lettce vs. Apple	**	p<0.01
			Cooked rice vs. Apple	**	p<0.01					Cooked rice vs. Apple	**	p<0.01
		AF4	Soil vs. Lettce	**	p<0.01				ZF4	Soil vs. Lettce	**	p<0.01
			Soil vs. Cooked rice	**	p<0.01					Soil vs. Cooked rice	**	p<0.01
			Soil vs. Apple	**	p<0.01					Soil vs. Apple	**	p<0.01
			Lettce vs. Cooked rice	**	p<0.01					Lettce vs. Cooked rice	**	p<0.01
			Lettce vs. Apple	**	p<0.01					Lettce vs. Apple	**	p<0.01
			Cooked rice vs. Apple	**	p<0.01					Cooked rice vs. Apple	**	p<0.01
		AF5	Soil vs. Lettce	**	p<0.01			Intestinal phase	ZF1	Soil vs. Lettce	*	p<0.05
			Soil vs. Cooked rice	**	p<0.01					Soil vs. Cooked rice	**	p<0.01
			Soil vs. Apple	**	p<0.01					Soil vs. Apple	ns	0.205
			Lettce vs. Cooked rice	**	p<0.01					Lettce vs. Cooked rice	**	p<0.01
			Lettce vs. Apple	**	p<0.01					Lettce vs. Apple	**	p<0.01
			Cooked rice vs. Apple	**	p<0.01					Cooked rice vs. Apple	**	p<0.01
	Intestinal phase	AF1	Soil vs. Lettce	**	p<0.01				ZF2	Soil vs. Lettce	**	p<0.01
			Soil vs. Cooked rice	**	p<0.01					Soil vs. Cooked rice	ns	0.212
			Soil vs. Apple	**	p<0.01					Soil vs. Apple	**	p<0.01
			Lettce vs. Cooked rice	**	p<0.01					Lettce vs. Cooked rice	**	p<0.01
			Lettce vs. Apple	**	p<0.01					Lettce vs. Apple	**	p<0.01
			Cooked rice vs. Apple	**	p<0.01					Cooked rice vs. Apple	**	p<0.01
		AF2	Soil vs. Lettce	**	p<0.01				ZF3	Soil vs. Lettce	**	p<0.01
			Soil vs. Cooked rice	**	p<0.01					Soil vs. Cooked rice	**	p<0.01
			Soil vs. Apple	**	p<0.01					Soil vs. Apple	**	p<0.01
			Lettce vs. Cooked rice	**	p<0.01					Lettce vs. Cooked rice	**	p<0.01
			Lettce vs. Apple	ns	0.534					Lettce vs. Apple	**	p<0.01
			Cooked rice vs. Apple	**	p<0.01					Cooked rice vs. Apple	**	p<0.01
		AF3	Soil vs. Lettce	**	p<0.01				ZF4	Soil vs. Lettce	**	p<0.01
			Soil vs. Cooked rice	**	p<0.01					Soil vs. Cooked rice	**	p<0.01
			Soil vs. Apple	**	p<0.01					Soil vs. Apple	**	p<0.01
			Lettce vs. Cooked rice	**	p<0.01					Lettce vs. Cooked rice	**	p<0.01
			Lettce vs. Apple	**	p<0.01					Lettce vs. Apple	**	p<0.01
			Cooked rice vs. Apple	**	p<0.01					Cooked rice vs. Apple	**	p<0.01
		AF4	Soil vs. Lettce	ns	0.18		After FeSO4 stabilization	Gastric phase	ZF1	Soil vs. Lettce	**	p<0.01
			Soil vs. Cooked rice	**	p<0.01					Soil vs. Cooked rice	ns	0.593
			Soil vs. Apple	**	p<0.01					Soil vs. Apple	**	p<0.01
			Lettce vs. Cooked rice	**	p<0.01					Lettce vs. Cooked rice	**	p<0.01
			Lettce vs. Apple	**	p<0.01					Lettce vs. Apple	**	p<0.01
			Cooked rice vs. Apple	**	p<0.01					Cooked rice vs. Apple	**	p<0.01
		AF5	Soil vs. Lettce	**	p<0.01				ZF2	Soil vs. Lettce	**	p<0.01
			Soil vs. Cooked rice	**	p<0.01					Soil vs. Cooked rice	**	p<0.01
			Soil vs. Apple	**	p<0.01					Soil vs. Apple	**	p<0.01
			Lettce vs. Cooked rice	**	p<0.01					Lettce vs. Cooked rice	**	p<0.01
			Lettce vs. Apple	**	p<0.01					Lettce vs. Apple	ns	0.608
			Cooked rice vs. Apple	**	p<0.01					Cooked rice vs. Apple	**	p<0.01
After FeSO4 stabilization	Gastric phase	AF1	Soil vs. Lettce	**	p<0.01				ZF3	Soil vs. Lettce	**	p<0.01
			Soil vs. Cooked rice	**	p<0.01					Soil vs. Cooked rice	**	p<0.01
			Soil vs. Apple	**	p<0.01					Soil vs. Apple	**	p<0.01
			Lettce vs. Cooked rice	**	p<0.01					Lettce vs. Cooked rice	**	p<0.01
			Lettce vs. Apple	**	p<0.01					Lettce vs. Apple	ns	0.578
			Cooked rice vs. Apple	**	p<0.01					Cooked rice vs. Apple	**	p<0.01
		AF2	Soil vs. Lettce	**	p<0.01				ZF4	Soil vs. Lettce	**	p<0.01
			Soil vs. Cooked rice	**	p<0.01					Soil vs. Cooked rice	**	p<0.01
			Soil vs. Apple	**	p<0.01					Soil vs. Apple	**	p<0.01
			Lettce vs. Cooked rice	**	p<0.01					Lettce vs. Cooked rice	**	p<0.01
			Lettce vs. Apple	**	p<0.01					Lettce vs. Apple	**	p<0.01
			Cooked rice vs. Apple	**	p<0.01					Cooked rice vs. Apple	**	p<0.01
		AF3	Soil vs. Lettce	**	p<0.01			Intestinal phase	ZF1	Soil vs. Lettce	*	p<0.05
			Soil vs. Cooked rice	**	p<0.01					Soil vs. Cooked rice	**	p<0.01
			Soil vs. Apple	**	p<0.01					Soil vs. Apple	*	p<0.05
			Lettce vs. Cooked rice	**	p<0.01					Lettce vs. Cooked rice	**	p<0.01
			Lettce vs. Apple	**	p<0.01					Lettce vs. Apple	**	p<0.01
			Cooked rice vs. Apple	**	p<0.01					Cooked rice vs. Apple	**	p<0.01
		AF4	Soil vs. Lettce	**	p<0.01				ZF2	Soil vs. Lettce	**	p<0.01
			Soil vs. Cooked rice	**	p<0.01					Soil vs. Cooked rice	**	p<0.01
			Soil vs. Apple	**	p<0.01					Soil vs. Apple	**	p<0.01
			Lettce vs. Cooked rice	**	p<0.01					Lettce vs. Cooked rice	**	p<0.01
			Lettce vs. Apple	**	p<0.01					Lettce vs. Apple	**	p<0.01
			Cooked rice vs. Apple	**	p<0.01					Cooked rice vs. Apple	**	p<0.01
		AF5	Soil vs. Lettce	**	p<0.01				ZF3	Soil vs. Lettce	**	p<0.01
			Soil vs. Cooked rice	**	p<0.01					Soil vs. Cooked rice	**	p<0.01
			Soil vs. Apple	**	p<0.01					Soil vs. Apple	**	p<0.01
			Lettce vs. Cooked rice	**	p<0.01					Lettce vs. Cooked rice	**	p<0.01
			Lettce vs. Apple	**	p<0.01					Lettce vs. Apple	**	p<0.01
			Cooked rice vs. Apple	**	p<0.01					Cooked rice vs. Apple	**	p<0.01
	Intestinal phase	AF1	Soil vs. Lettce	**	p<0.01				ZF4	Soil vs. Lettce	**	p<0.01
			Soil vs. Cooked rice	**	p<0.01					Soil vs. Cooked rice	**	p<0.01
			Soil vs. Apple	**	p<0.01					Soil vs. Apple	**	p<0.01
			Lettce vs. Cooked rice	**	p<0.01					Lettce vs. Cooked rice	**	p<0.01
			Lettce vs. Apple	**	p<0.01					Lettce vs. Apple	**	p<0.01
			Cooked rice vs. Apple	**	p<0.01					Cooked rice vs. Apple	**	p<0.01
		AF2	Soil vs. Lettce	**	p<0.01
			Soil vs. Cooked rice	**	p<0.01
			Soil vs. Apple	**	p<0.01
			Lettce vs. Cooked rice	**	p<0.01
			Lettce vs. Apple	**	p<0.01
			Cooked rice vs. Apple	*	p<0.05
		AF3	Soil vs. Lettce	**	p<0.01
			Soil vs. Cooked rice	**	p<0.01
			Soil vs. Apple	ns	0.879
			Lettce vs. Cooked rice	**	p<0.01
			Lettce vs. Apple	**	p<0.01
			Cooked rice vs. Apple	**	p<0.01
		AF4	Soil vs. Lettce	**	p<0.01
			Soil vs. Cooked rice	**	p<0.01
			Soil vs. Apple	**	p<0.01
			Lettce vs. Cooked rice	**	p<0.01
			Lettce vs. Apple	**	p<0.01
			Cooked rice vs. Apple	**	p<0.01
		AF5	Soil vs. Lettce	**	p<0.01
			Soil vs. Cooked rice	**	p<0.01
			Soil vs. Apple	**	p<0.01
			Lettce vs. Cooked rice	**	p<0.01
			Lettce vs. Apple	**	p<0.01
			Cooked rice vs. Apple	**	p<0.01
ns = not significant (p > 0.05)
* = p < 0.05
** = p < 0.01
